# Supplementary material
Source: PubMed Central journal article supplement (PMC11385712)

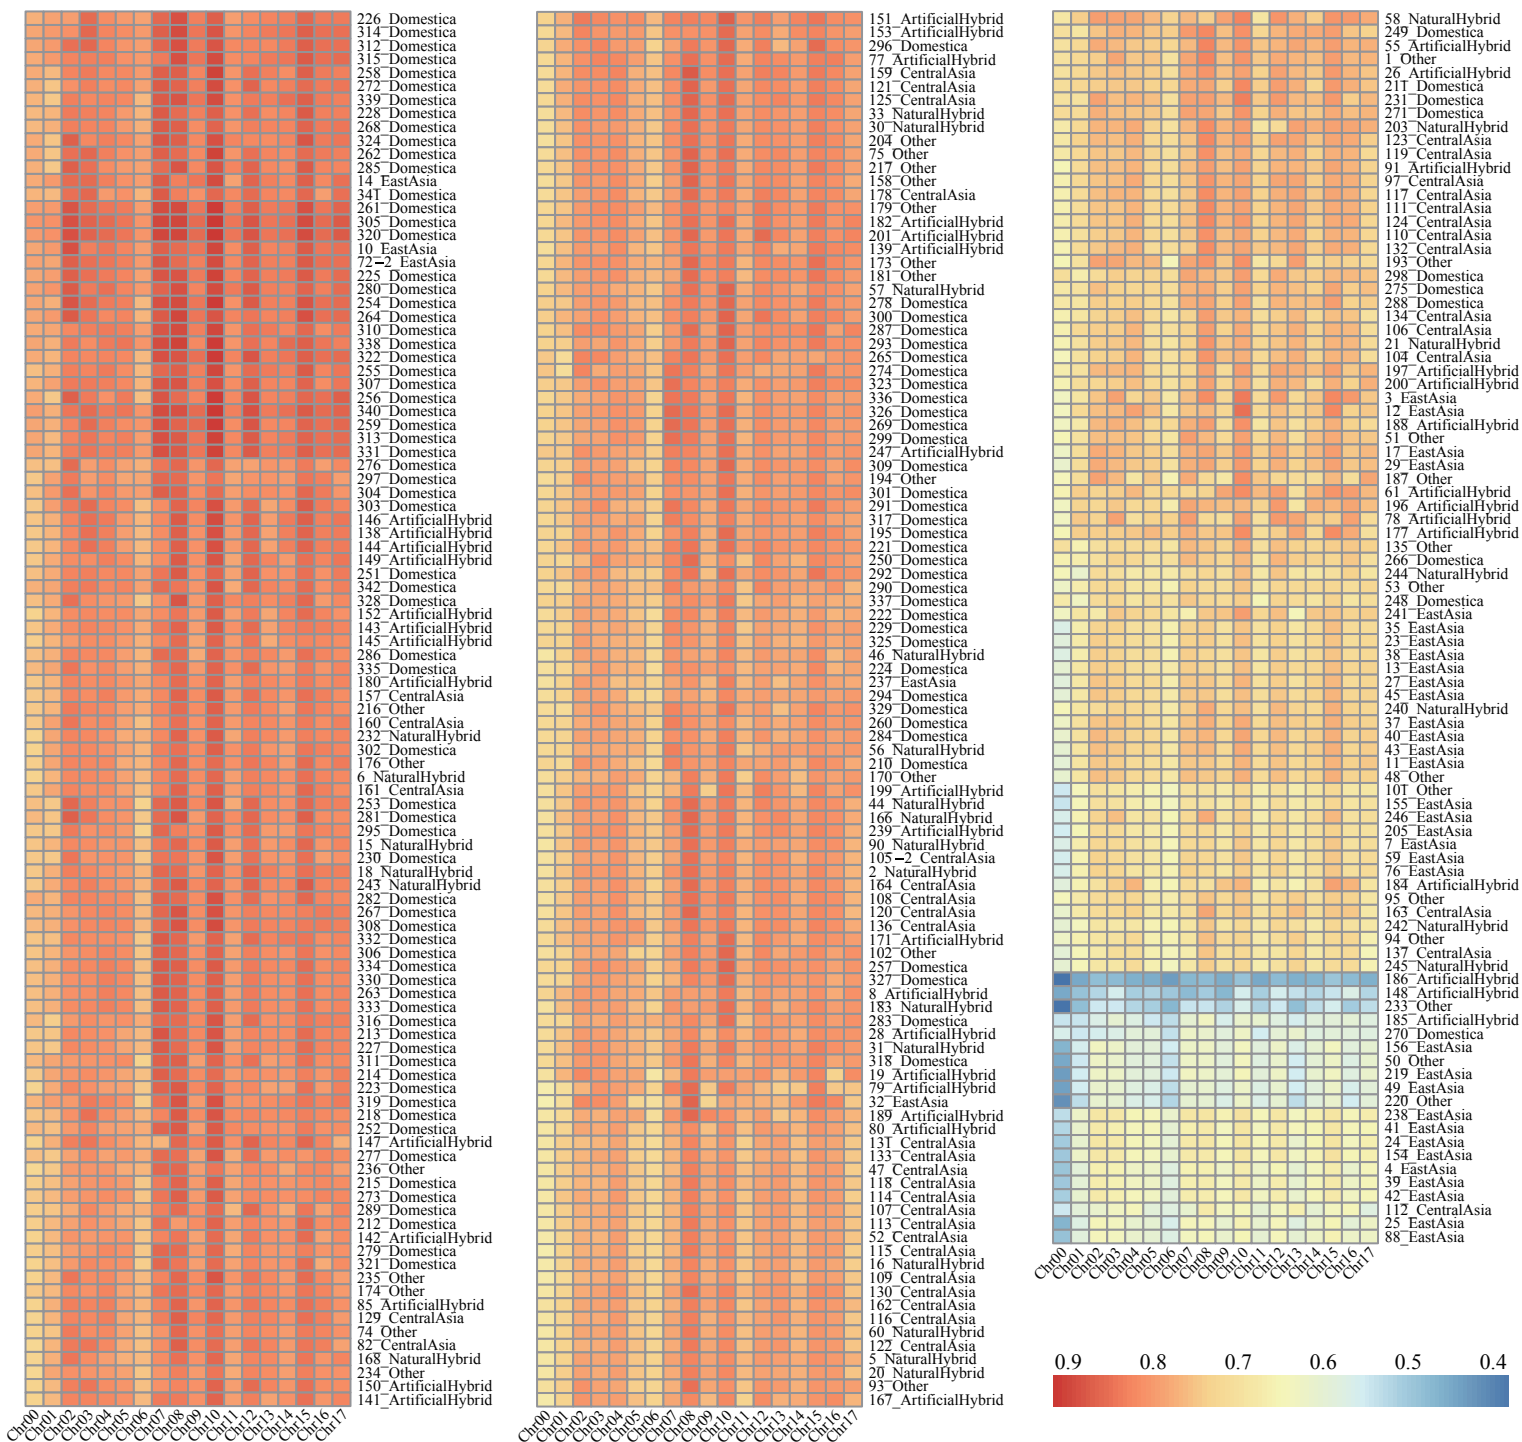

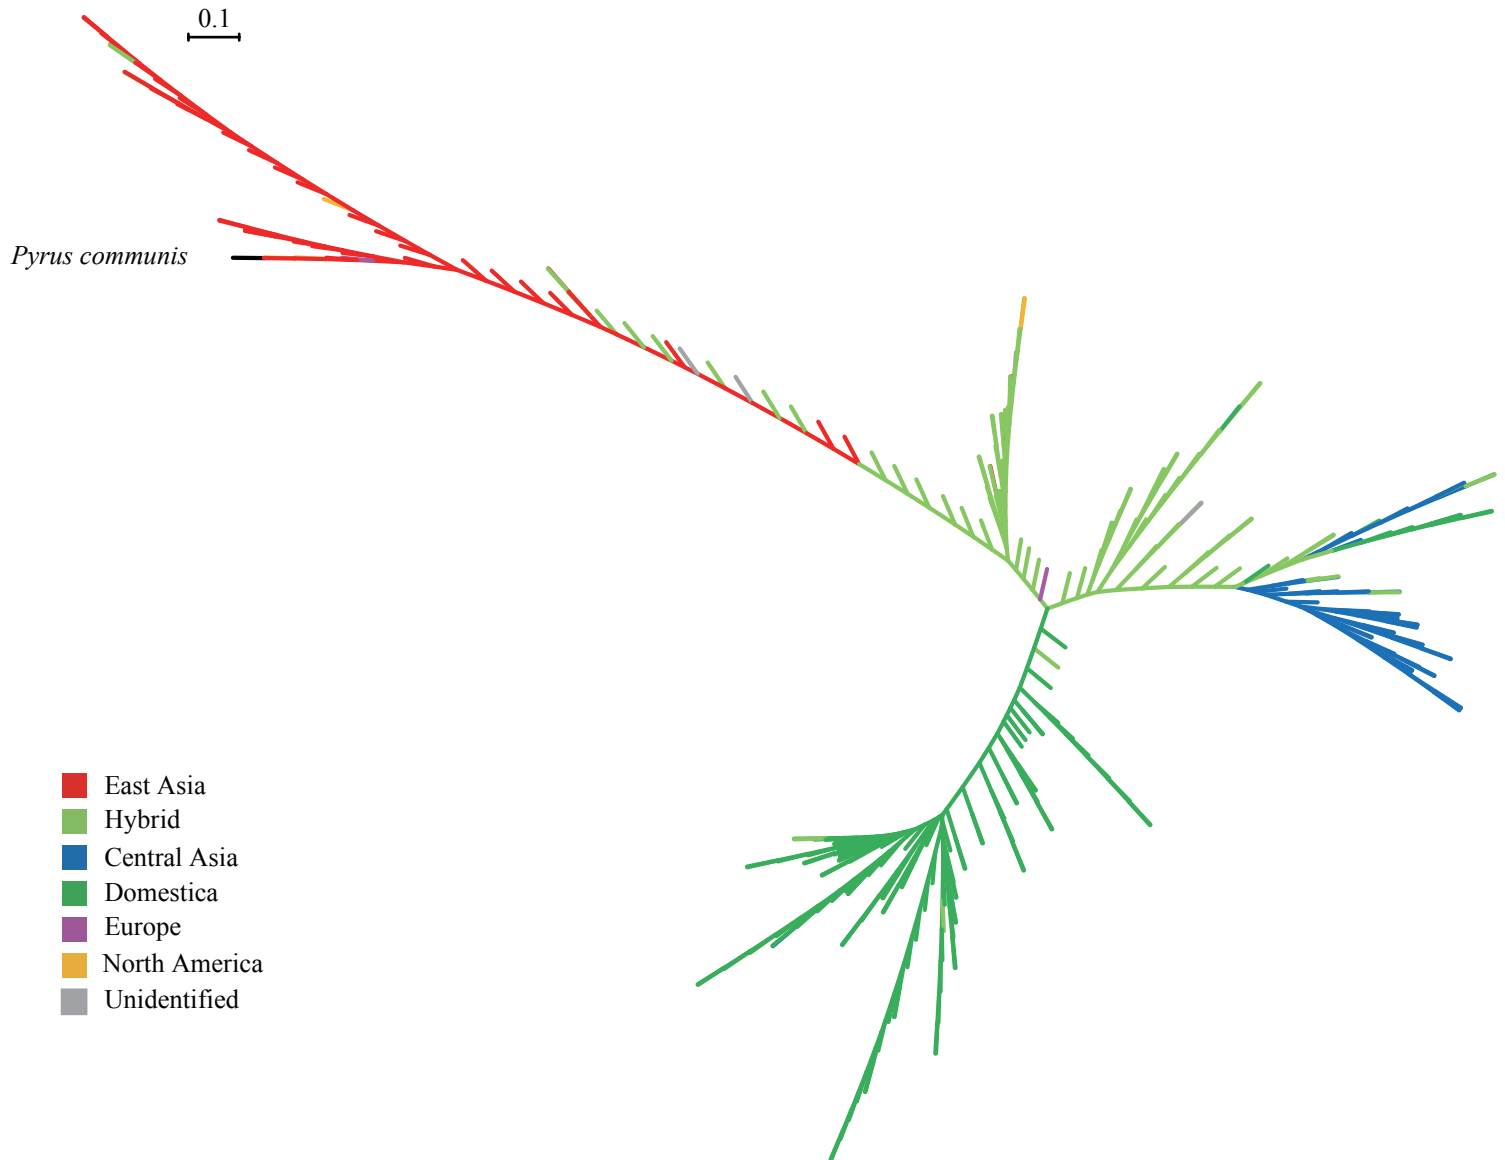

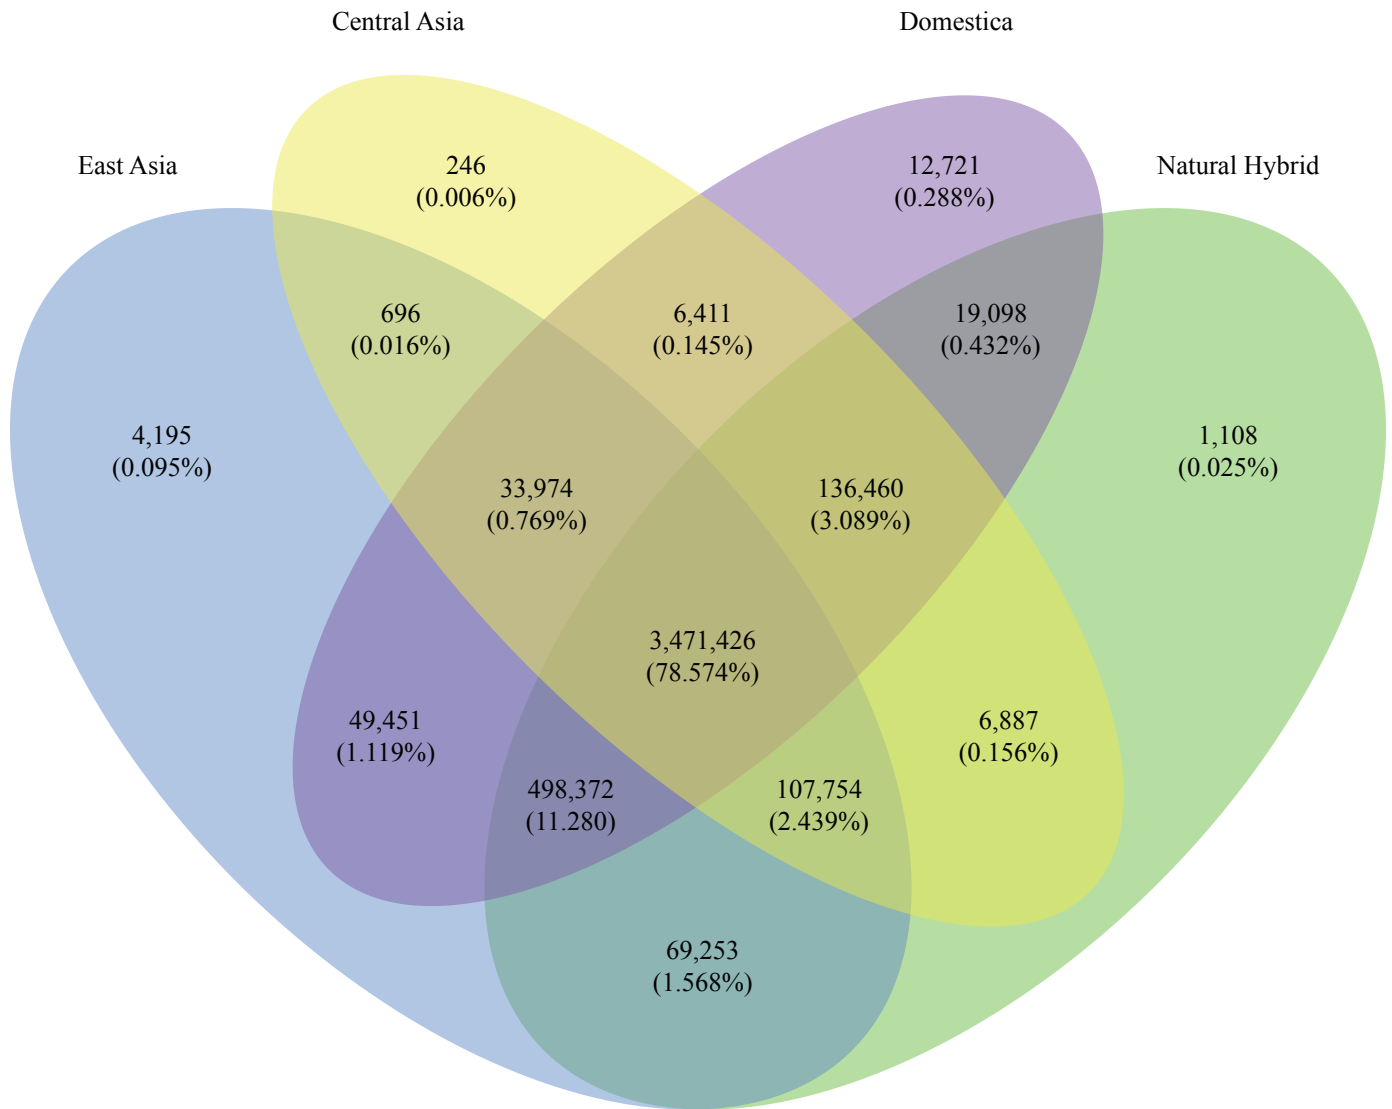

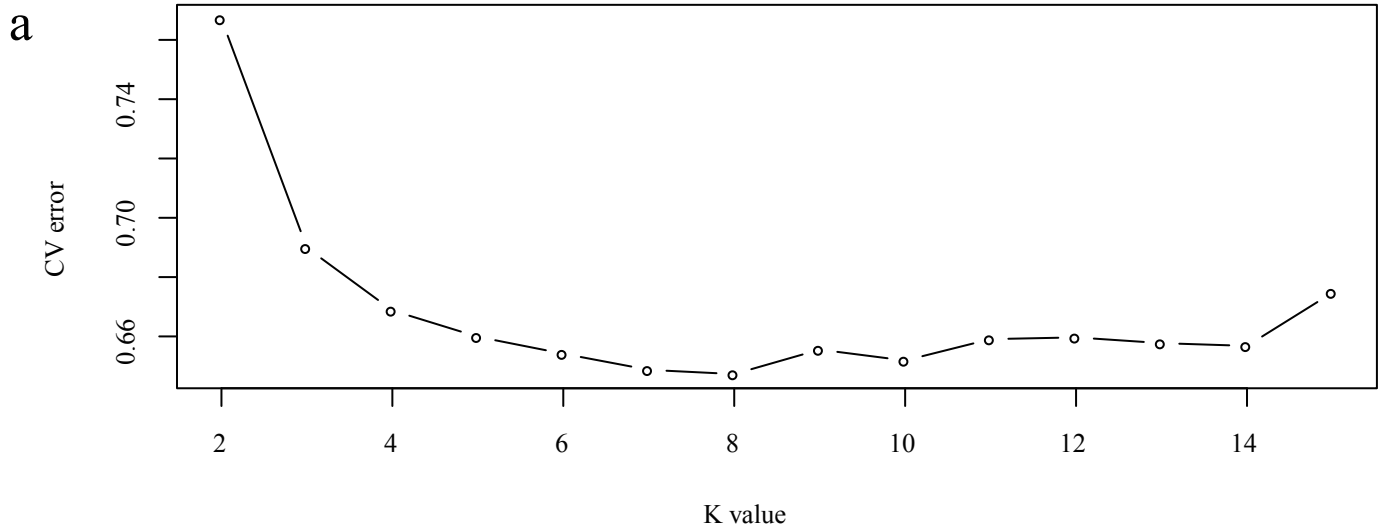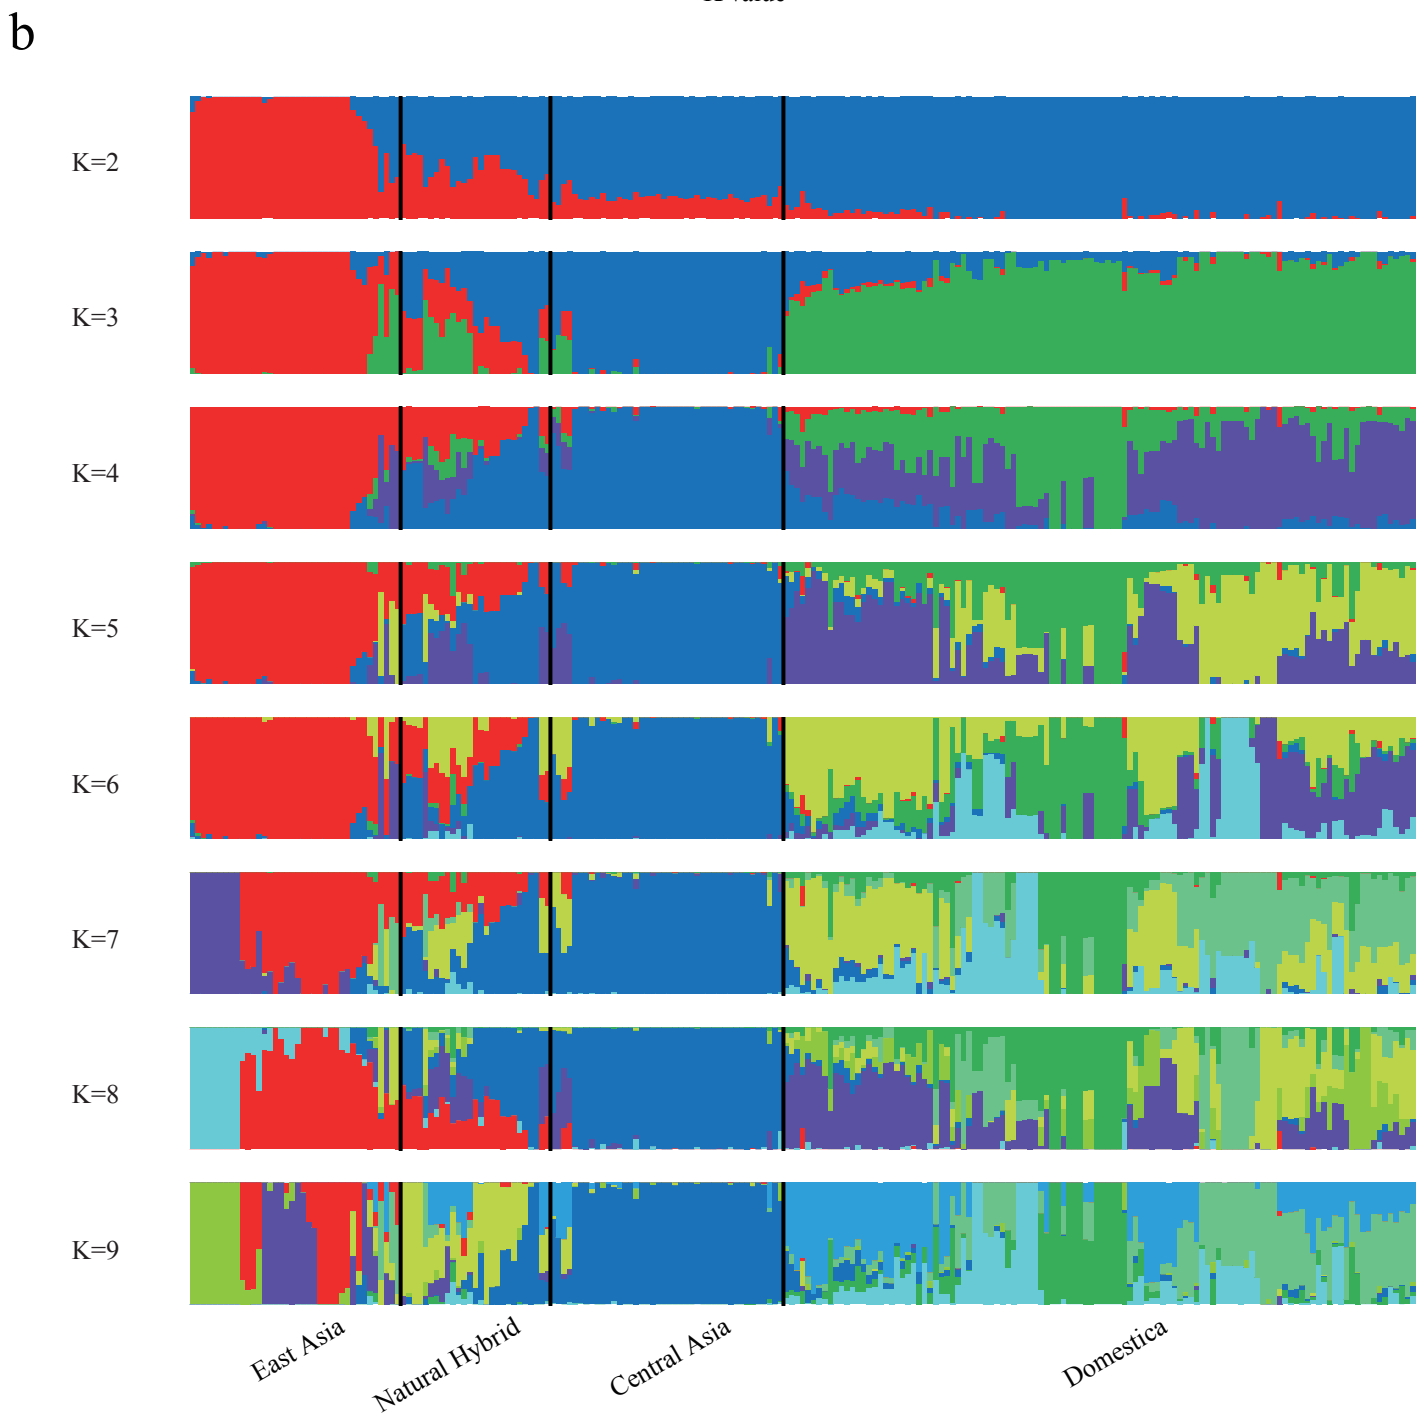

Supplementary fig. 5

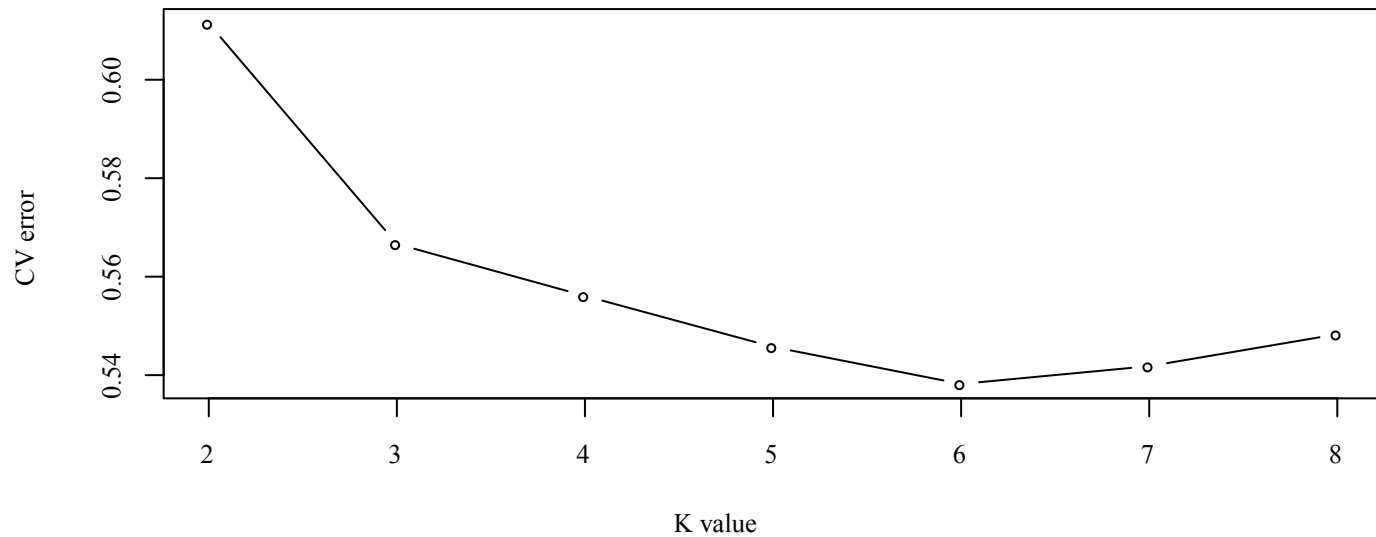

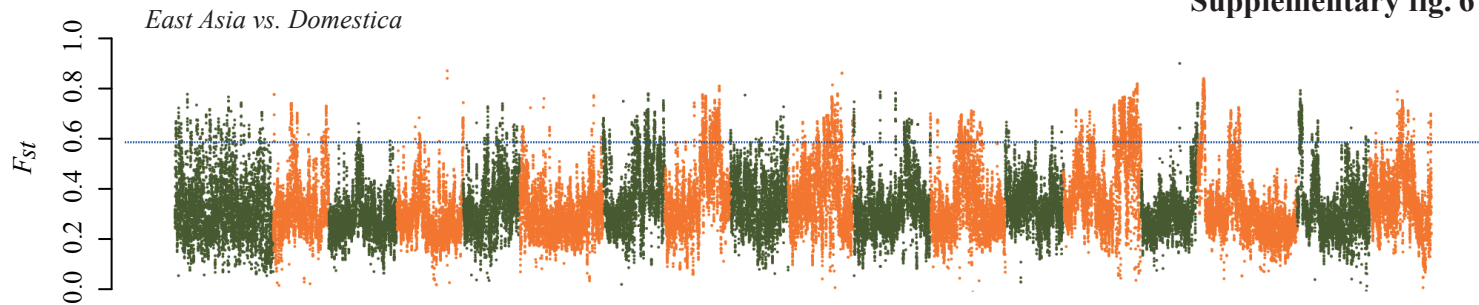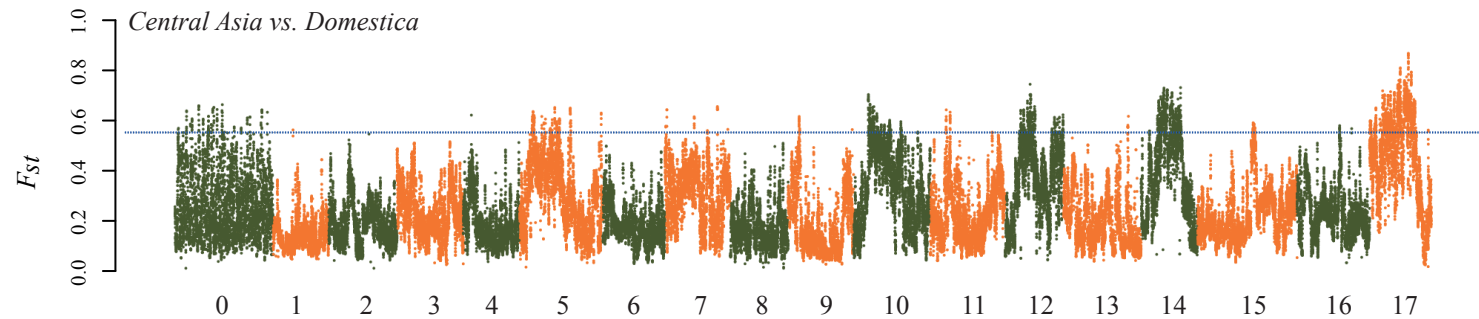

Supplementary fig. 7

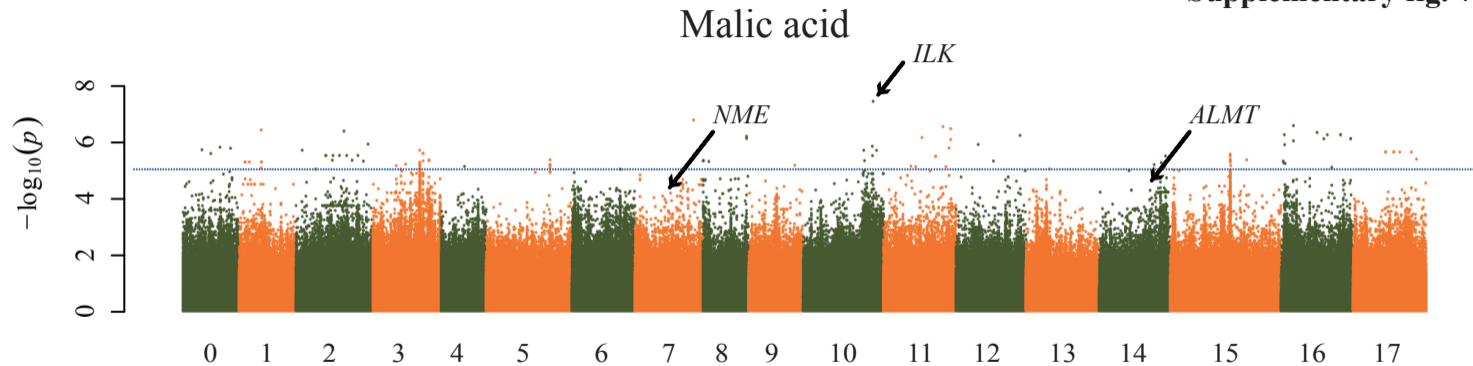

Sucrose

Supplementary fig. 8

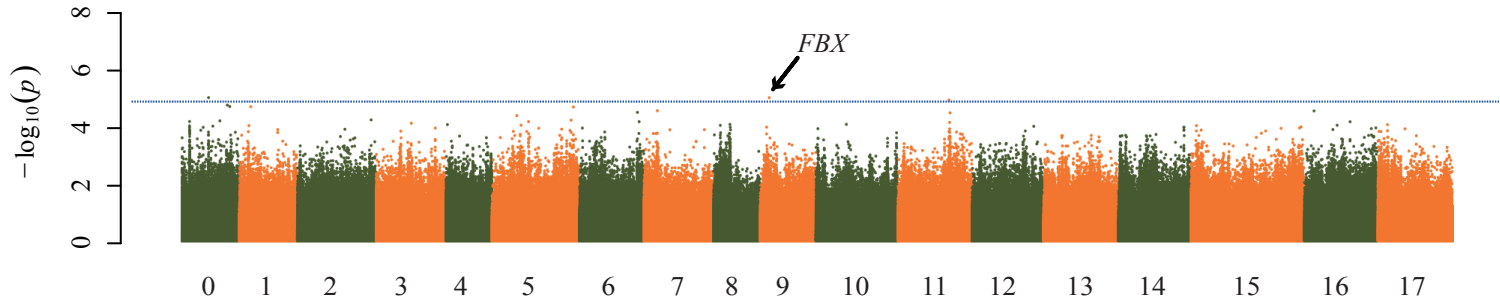



# Fructose1

# Supplementary fig. 9

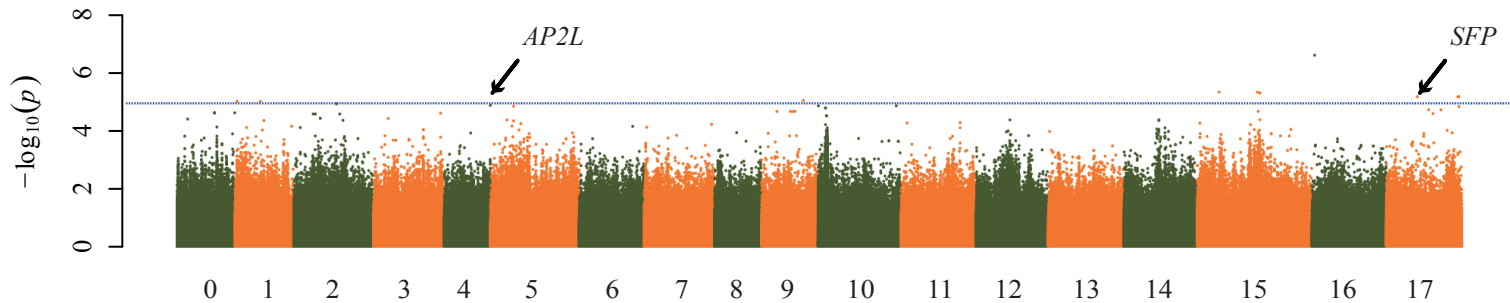

# Fructose2

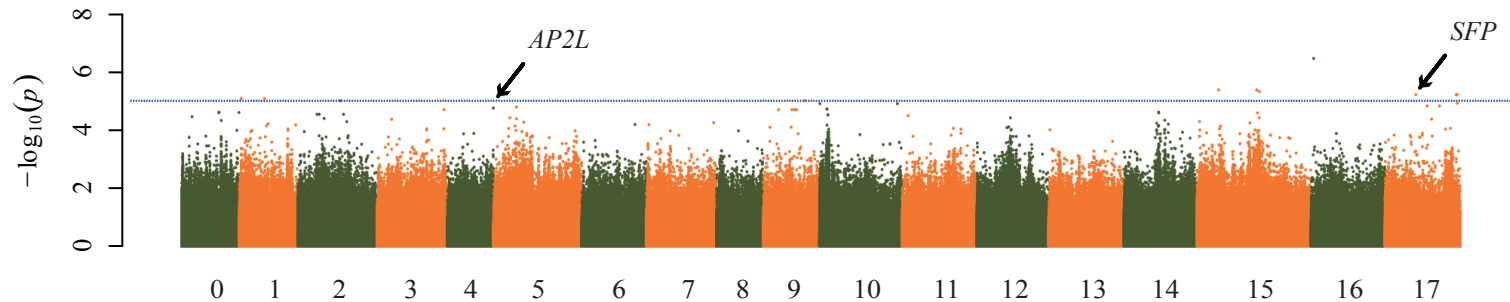

SSC

Supplementary fig. 10

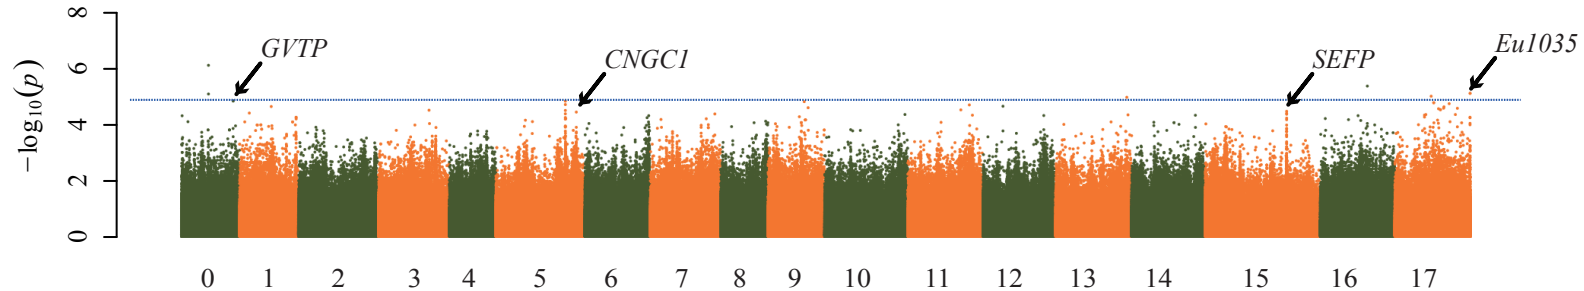

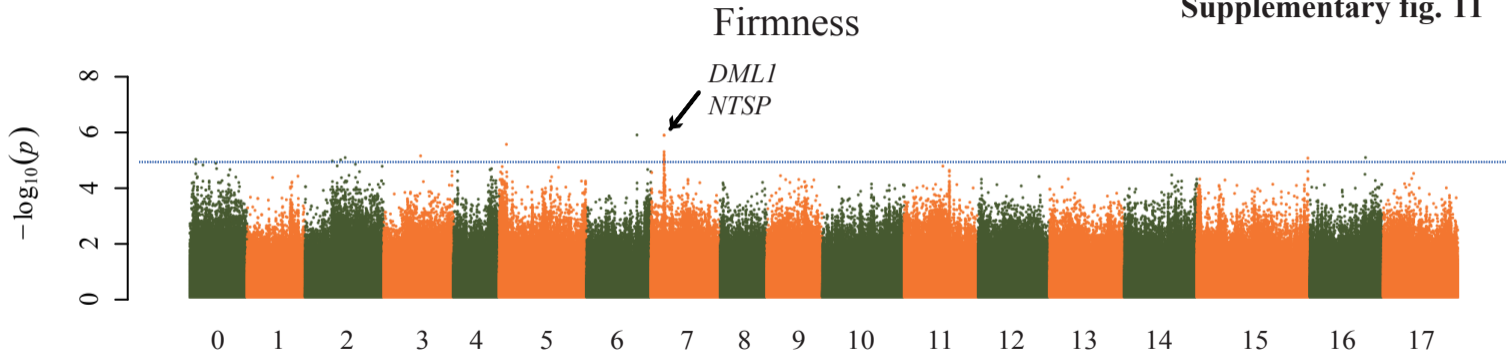

# Fruit Weight

Supplementary fig. 12

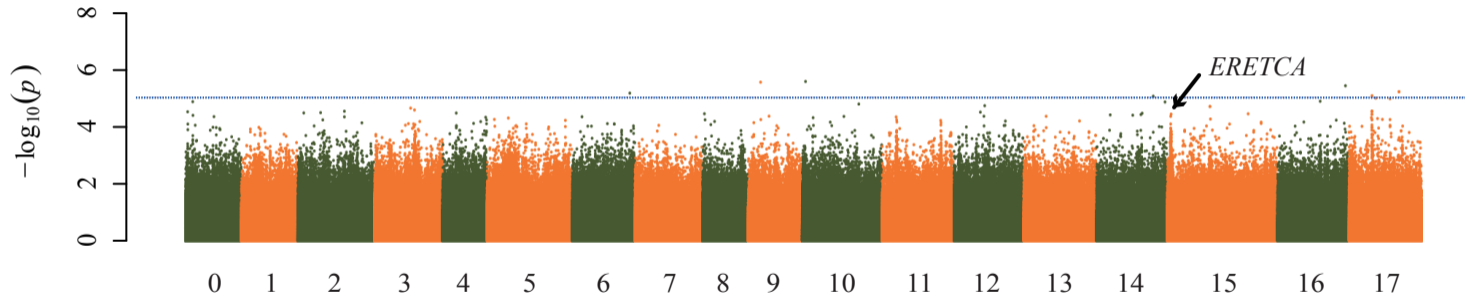

Supplement: PBI-19-2206-s002.pdf [file PBI-19-2206-s002.pdf]
